# Supplementary material for: Feeling Stressed and Ugly? Leave the City and Visit Nature! An Experiment on Self- and Other-Perceived Stress and Attractiveness Levels
Source: PubMed Central journal article supplement (PMC7698395; doi:10.3390/ijerph17228519), 2020-11-17
Supplement: ijerph-17-08519-s001.pdf [file ijerph-17-08519-s001.pdf]

**Table S1.** Correlations between attractiveness and stress ratings.

|      |        | <b>Self</b> |          | <b>Other</b> |          |
|------|--------|-------------|----------|--------------|----------|
|      |        | <i>r</i>    | <i>p</i> | <i>r</i>     | <i>p</i> |
| pre  | nature | -0.73       | <0.001   | -0.63        | 0.002    |
|      | urban  | -0.54       | 0.014    | -0.61        | 0.003    |
| post | nature | -0.34       | 0.147    | -0.60        | 0.004    |
|      | urban  | -0.18       | 0.438    | -0.17        | 0.466    |

**Table S2.** Correlations between self- and other-ratings.

|      |        | <b>Stress</b> |          | <b>Attractiveness</b> |          |
|------|--------|---------------|----------|-----------------------|----------|
|      |        | <i>r</i>      | <i>p</i> | <i>r</i>              | <i>p</i> |
| pre  | nature | 0.19          | 0.432    | 0.44                  | 0.054    |
|      | urban  | 0.43          | 0.061    | 0.28                  | 0.228    |
| post | nature | -0.19         | 0.419    | 0.16                  | 0.510    |
|      | urban  | 0.19          | 0.427    | 0.24                  | 0.309    |
